# Supplementary material for: Transition-metal-free synthesis of arylboronates via thermal generation of aryl radicals from triarylbismuthines in air
Source: publisher site journal article supplement (doi:10.3762/bjoc.20.216), 2024-10-11

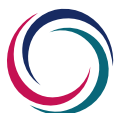

## Supporting Information

for

### **Transition-metal-free synthesis of arylboronates via thermal generation of aryl radicals from triarylbismuthines in air**

Yuki Yamamoto, Yuki Konakazawa, Kohsuke Fujiwara and Akiya Ogawa

*Beilstein J. Org. Chem.* **2024**, *20*, 2577–2584. [doi:10.3762/bjoc.20.216](https://doi.org/10.3762/bjoc.20.216)

### **Investigation of the boron residue in the crude mixture by $^{11}\text{B}$ NMR measurement, characterization data of the compounds, and copies of $^1\text{H}$ NMR and $^{13}\text{C}\{^1\text{H}\}$ NMR spectra**

## CONTENTS

|                                                                                            | page   |
|--------------------------------------------------------------------------------------------|--------|
| Investigation of the boron residue in the crude mixture by $^{11}\text{B}$ NMR measurement | S2     |
| Characterization data of the arylboronates <b>3</b>                                        | S3–S5  |
| Copies of $^1\text{H}$ NMR and $^{13}\text{C}$ NMR spectra of the arylboronates <b>3</b>   | S6–S13 |

## Investigation of the boron residue in the crude mixture by $^{11}\text{B}$ NMR measurement

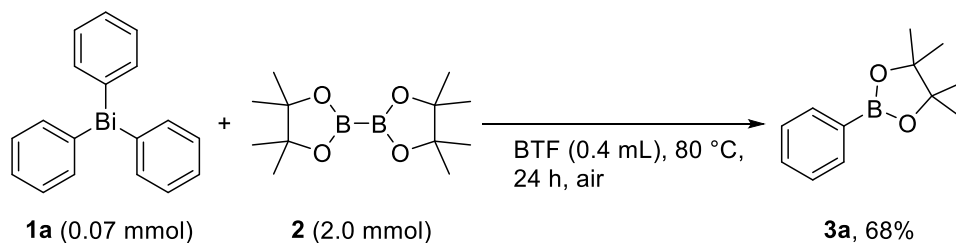

The reaction was carried out under the optimal condition (entry 2 in Scheme 2). The reaction mixture was then analyzed by  $^{11}\text{B}$  NMR measurement in  $\text{CDCl}_3$  using  $\text{BF}_3 \cdot \text{Et}_2\text{O}$  as the internal standard ( $\delta = 0.0$  ppm).

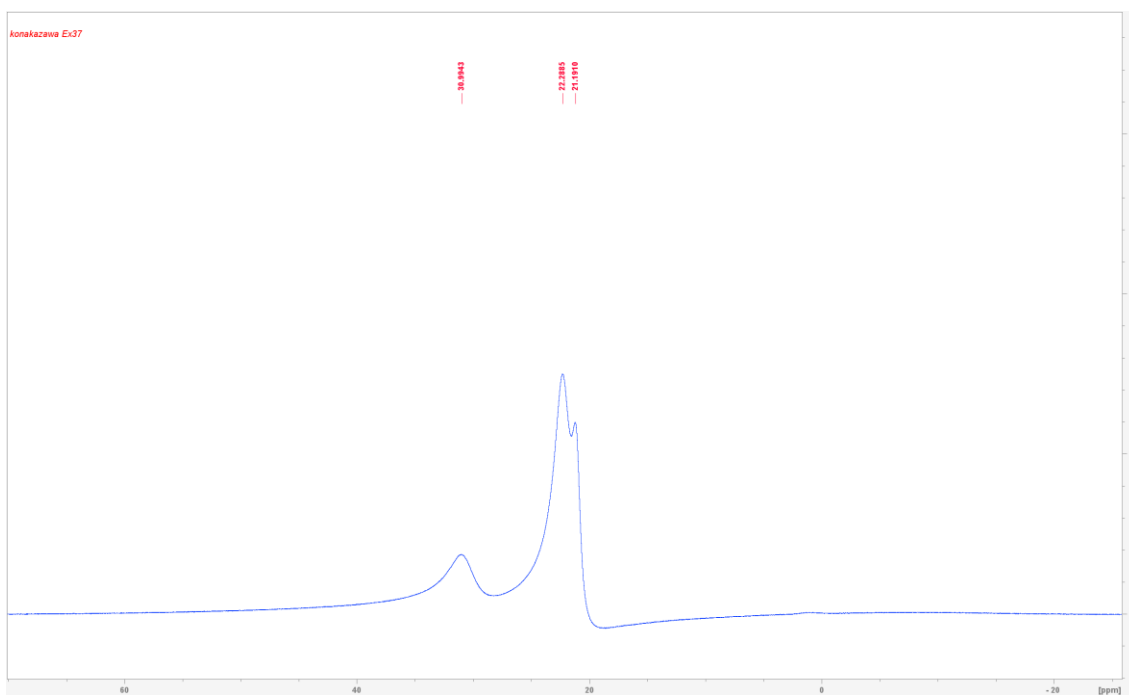

The peaks of bispinacolatodiboron **2** ( $\delta_{\text{B}} = 30.5$  ppm)<sup>[1]</sup> and the product **3a** ( $\delta_{\text{B}} = 30.9$  ppm)<sup>[2]</sup> were overlapped in the  $^{11}\text{B}$  NMR spectra. In addition, two other peaks were observed that could be attributed as pinB–O–Bpin ( $\delta_{\text{B}} = 21.2$  ppm)<sup>[1]</sup> and pinB–OH ( $\delta_{\text{B}} = 22.3$  ppm)<sup>[3]</sup>, respectively. Therefore, we estimated that some of **2** might be decomposed under the reaction conditions.

### Characterization data of the arylboronates 3

#### *4,4,5,5-Tetramethyl-2-phenyl-1,3,2-dioxaborolane (3a)*<sup>[2]</sup>

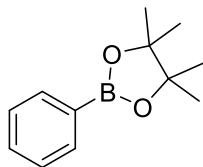

Light yellow solid, 22.6 mg, 53% yield; <sup>1</sup>H NMR (500 MHz, CDCl<sub>3</sub>): δ 7.81 (d, *J* = 7.8 Hz, 2H), 7.46–7.44 (m, 1H), 7.38–7.35 (m, 2H), 1.35 (s, 12H); <sup>13</sup>C NMR (126 MHz, CDCl<sub>3</sub>): δ 134.8, 131.3, 127.8, 83.8, 24.9. The <sup>13</sup>C signal bound to boron could not be observed due to quadrupolar relaxation.

#### *4,4,5,5-Tetramethyl-2-(o-tolyl)-1,3,2-dioxaborolane (3b)*<sup>[4]</sup>

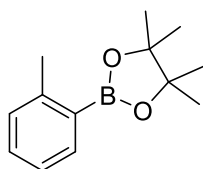

Colorless solid, 28.2 mg, 62% yield; <sup>1</sup>H NMR (500 MHz, CDCl<sub>3</sub>): δ 7.77–7.75 (m, 1H), 7.33–7.30 (m, 1H), 7.17–7.14 (m, 2H), 2.54 (s, 3H), 1.34 (s, 12H) <sup>13</sup>C NMR (126 MHz, CDCl<sub>3</sub>): δ 144.9, 135.9, 130.8, 129.8, 124.7, 83.4, 24.9, 22.2. The <sup>13</sup>C signal bound to boron could not be observed due to quadrupolar relaxation.

#### *4,4,5,5-tetramethyl-2-(m-tolyl)-1,3,2-dioxaborolane (3c)*<sup>[4]</sup>

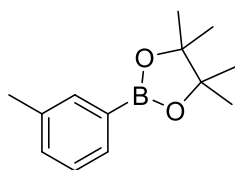

Colorless oil, 10.8 mg, 24% yield; <sup>1</sup>H NMR (500 MHz, CDCl<sub>3</sub>): δ 7.64 (s, 1H), 7.62–7.60 (m, 1H), 7.28–7.26 (m, 2H), 2.35 (s, 3H), 1.35 (s, 12H); <sup>13</sup>C NMR (126 MHz, CDCl<sub>3</sub>): δ 137.2, 135.4, 132.1, 131.8, 127.7, 83.7, 24.9, 21.3. The <sup>13</sup>C signal bound to boron could not be observed due to quadrupolar relaxation.

**4,4,5,5-Tetramethyl-2-(*p*-tolyl)-1,3,2-dioxaborolane (3d)**<sup>[5]</sup>

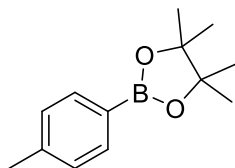

Light brown oil, 22.6 mg, 49% yield; <sup>1</sup>H NMR (500 MHz, CDCl<sub>3</sub>): δ 7.70 (d, *J* = 7.9 Hz, 2H), 7.19 (d, *J* = 7.6 Hz, 2H), 2.37 (s, 3H), 1.34 (s, 12H); <sup>13</sup>C NMR (126 MHz, CDCl<sub>3</sub>): δ 141.4, 134.8, 128.5, 83.6, 24.9, 21.8. The <sup>13</sup>C signal bound to boron could not be observed due to quadrupolar relaxation.

**2-(4-Methoxyphenyl)-4,4,5,5-tetramethyl-1,3,2-dioxaborolane (3e)**<sup>[4]</sup>

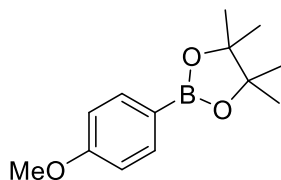

Colorless oil, 25.6 mg, 52% yield; <sup>1</sup>H NMR (500 MHz, CDCl<sub>3</sub>): δ 7.75 (d, *J* = 8.7 Hz, 2H), 6.90 (d, *J* = 8.7 Hz, 2H), 3.82 (s, 3H), 1.33 (s, 12H); <sup>13</sup>C NMR (126 MHz, CDCl<sub>3</sub>): δ 162.1, 136.5, 113.3, 83.6, 55.1, 24.9. The <sup>13</sup>C signal bound to boron could not be observed due to quadrupolar relaxation.

**2-(4-(Dimethoxymethyl)phenyl)-4,4,5,5-tetramethyl-1,3,2-dioxaborolane (3f)**<sup>[5]</sup>

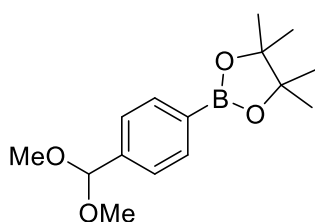

Colorless oil, 20.6 mg, 35% yield; <sup>1</sup>H NMR (500 MHz, CDCl<sub>3</sub>): δ 7.82 (d, *J* = 8.1 Hz, 2H), 7.45 (d, *J* = 7.9 Hz, 2H), 5.42 (s, 1H), 3.31 (s, 6H), 1.35 (s, 12H); <sup>13</sup>C NMR (126 MHz, CDCl<sub>3</sub>): δ 140.9, 134.7, 126.1, 102.9, 83.8, 52.6, 24.9. The <sup>13</sup>C signal bound to boron could not be observed due to quadrupolar relaxation.

**2-(4-Chlorophenyl)-4,4,5,5-tetramethyl-1,3,2-dioxaborolane (3g)**<sup>[4]</sup>

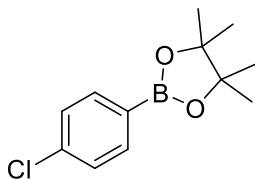

Colorless oil, 22.5 mg, 45% yield; <sup>1</sup>H NMR (500 MHz, CDCl<sub>3</sub>): δ 7.73 (d, *J* = 8.3 Hz, 2H), 7.34 (d, *J* = 8.4 Hz, 2H), 1.34 (s, 12H); <sup>13</sup>C NMR (126 MHz, CDCl<sub>3</sub>): δ 137.5, 136.1, 128.1, 84.0, 24.9. The <sup>13</sup>C signal bound to boron could not be observed due to quadrupolar relaxation.

**2-Mesityl-4,4,5,5-tetramethyl-1,3,2-dioxaborolane (3i)**<sup>[2]</sup>

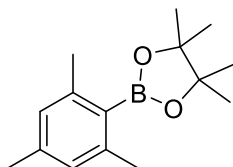

Colorless oil, 31.7 mg, 61% yield; <sup>1</sup>H NMR (500 MHz, CDCl<sub>3</sub>): δ 6.77 (s, 2H), 2.36 (s, 6H), 2.24 (s, 3H), 1.37 (s, 12H); <sup>13</sup>C NMR (126 MHz, CDCl<sub>3</sub>): δ 142.1, 138.9, 127.5, 83.5, 25.0, 22.2, 21.3. The <sup>13</sup>C signal bound to boron could not be observed due to quadrupolar relaxation.

The isolation of arylboronates **3c**, **3i**, and **3j** with sufficient isolated yields was somewhat difficult due to strong adsorption or decomposition on silica gel. The characterization of the arylboronates was determined from previously reported spectra.<sup>[2, 4, 6]</sup>

## References

- [1] De Smet, G.; Bai, X.; Mensch, C.; Sergeev, S.; Evano, G.; Maes, B. U. W. *Angew. Chem. Int. Ed.* **2022**, *61*, e202201751.
- [2] Tan, X.; Wang, X.; Hua Li, Z.; Wang, H. *J. Am. Chem. Soc.* **2022**, *144*, 23286–23291.
- [3] Ji, P.; Sawano, T.; Lin, Z.; Urban, A.; Boures, D.; Lin, W. *J. Am. Chem. Soc.* **2016**, *138*, 14860–14863.
- [4] Zhang, J.; Wei, R.; Ren, C.; Liu, L. L.; Wu, L. *J. Am. Chem. Soc.* **2023**, *145*, 15619–15629.
- [5] Clary, J. W.; J. Rettenmaier, T. J.; Snelling, R.; Bryks, W.; Banwell, J.; Wipke, W. T.; Singaram, B. *J. Org. Chem.* **2011**, *76*, 9602–9610.
- [6] Li, D.; Wei, L.; Xiong, W.; Jiang, H.; Qi, C. *J. Org. Chem.* **2023**, *88*, 5231–5237.

## Copies of $^1\text{H}$ NMR and $^{13}\text{C}$ NMR spectra of the arylboronates **3**

**Figure S1.**  $^1\text{H}$  and  $^{13}\text{C}\{^1\text{H}\}$  NMR spectra of compound **3a**

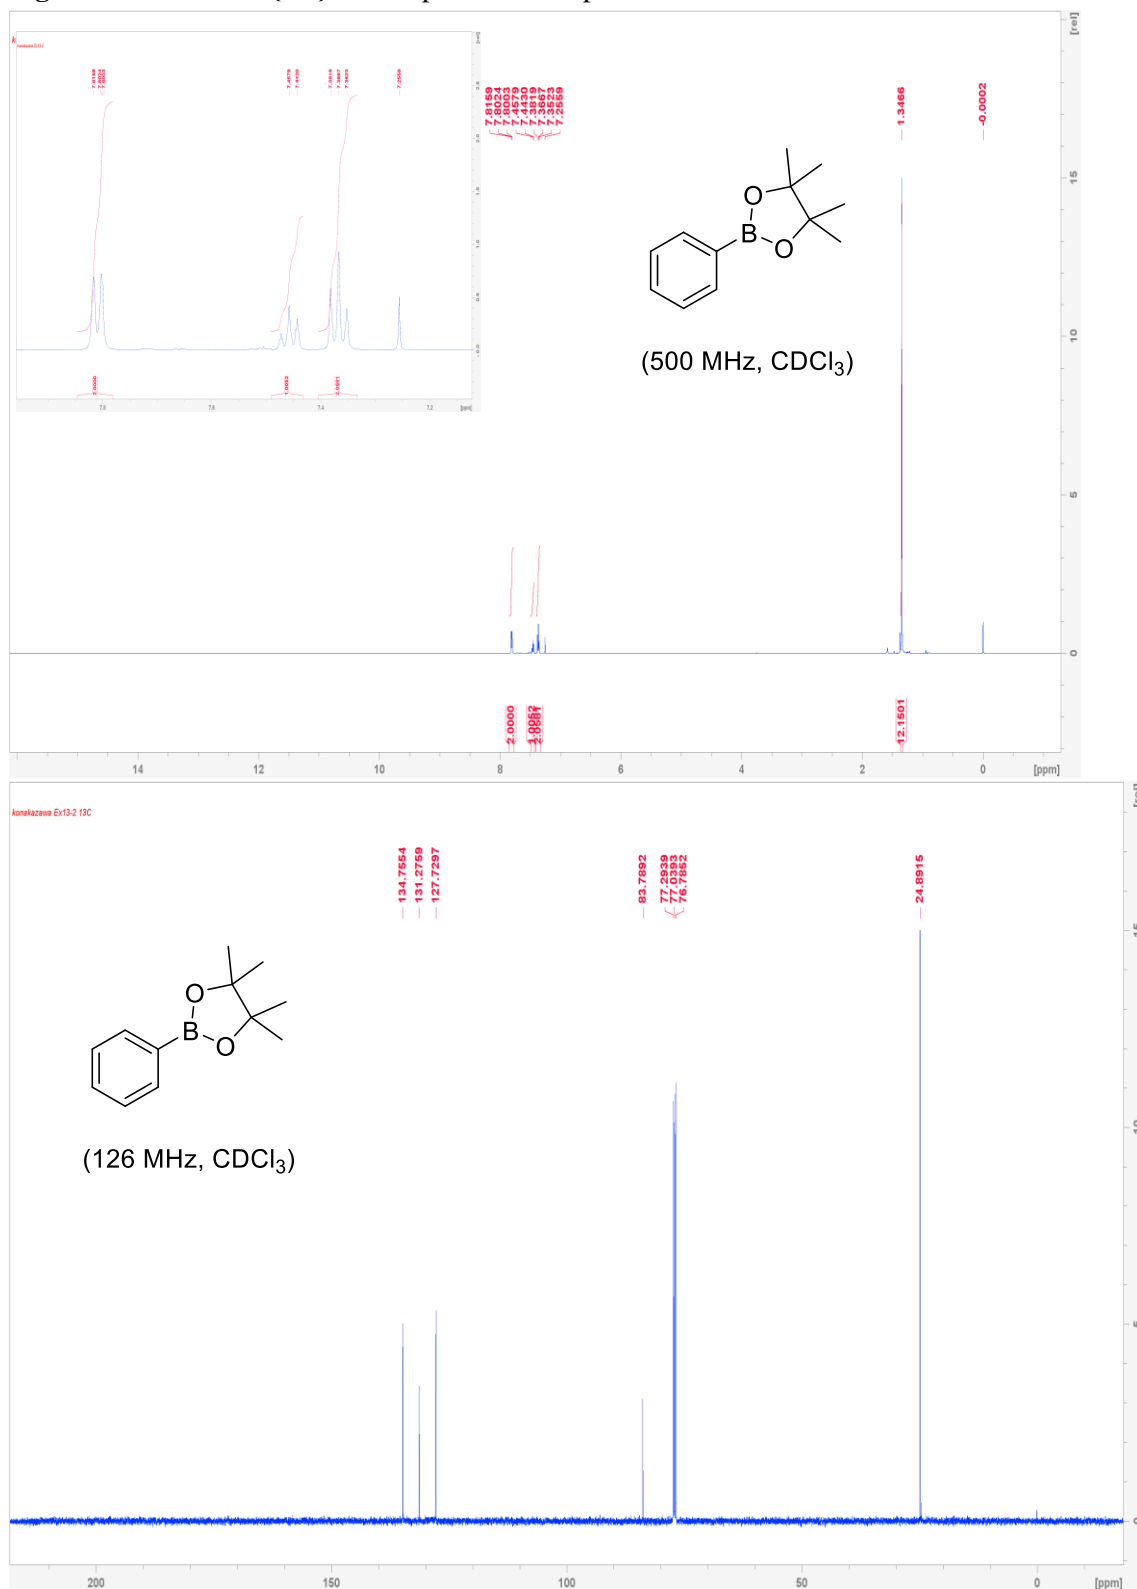

**Figure S2.**  $^1\text{H}$  and  $^{13}\text{C}\{^1\text{H}\}$  NMR spectra of compound **3b**

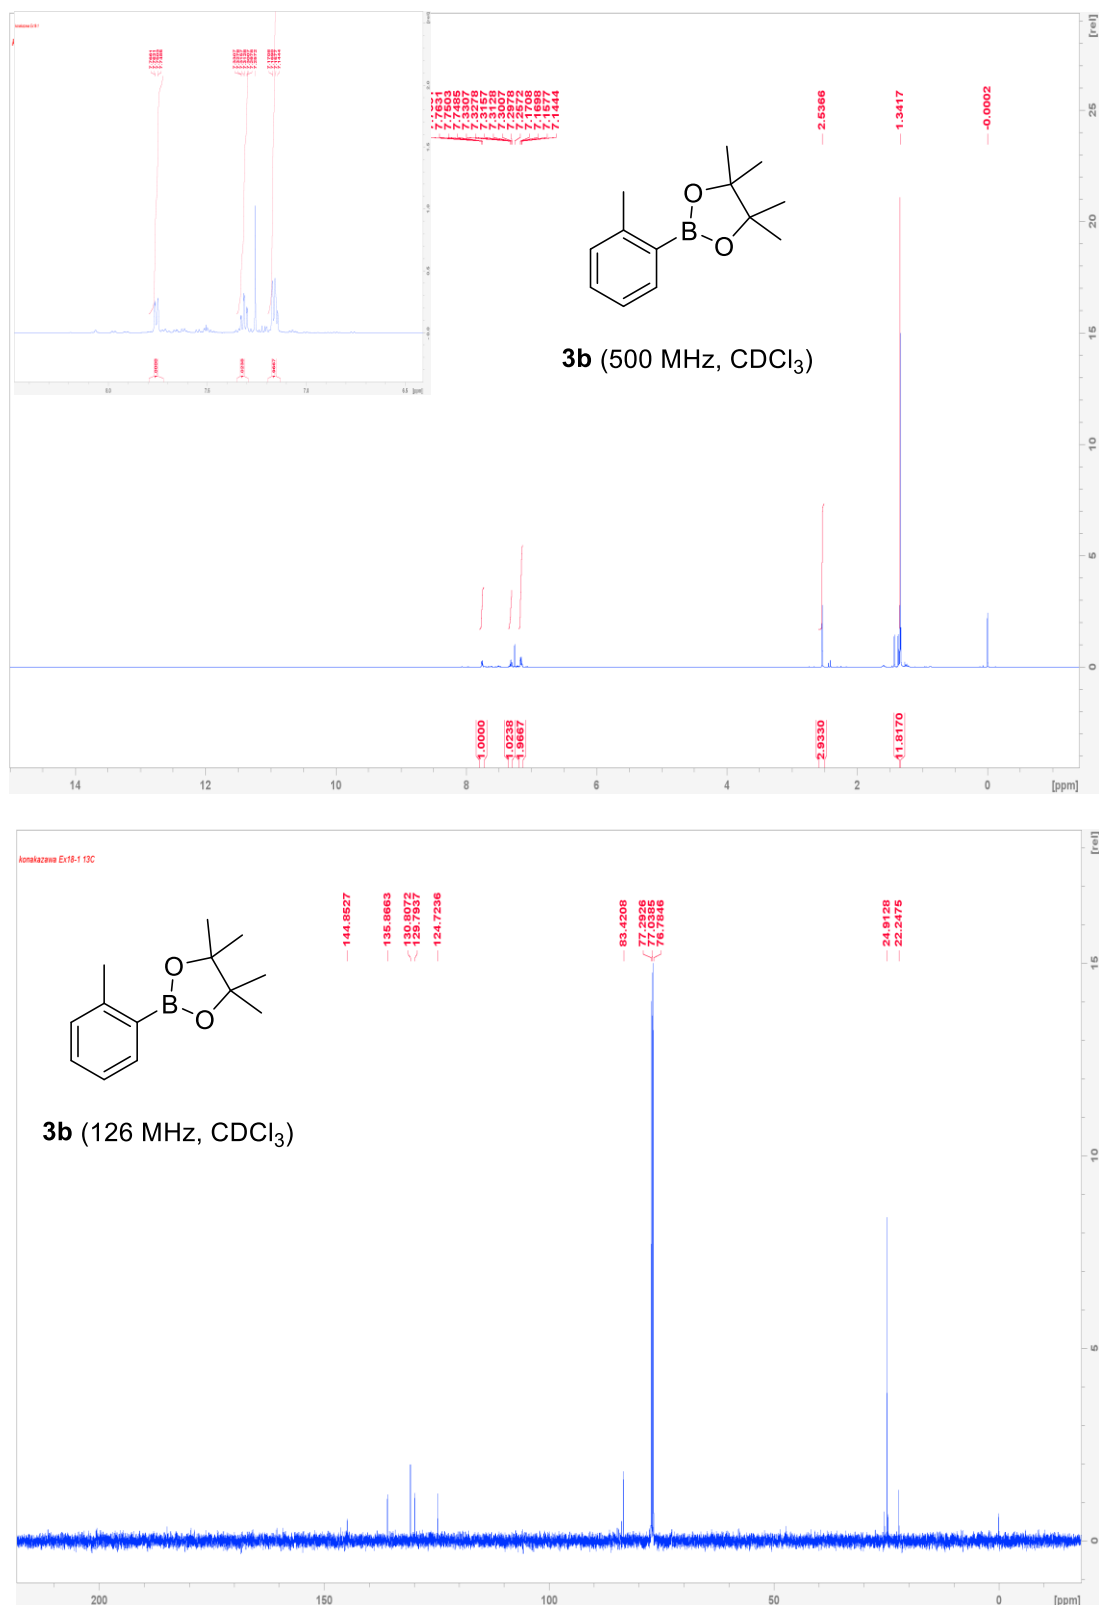



**Figure S3.**  $^1\text{H}$  and  $^{13}\text{C}\{^1\text{H}\}$  NMR spectra of compound **3c**

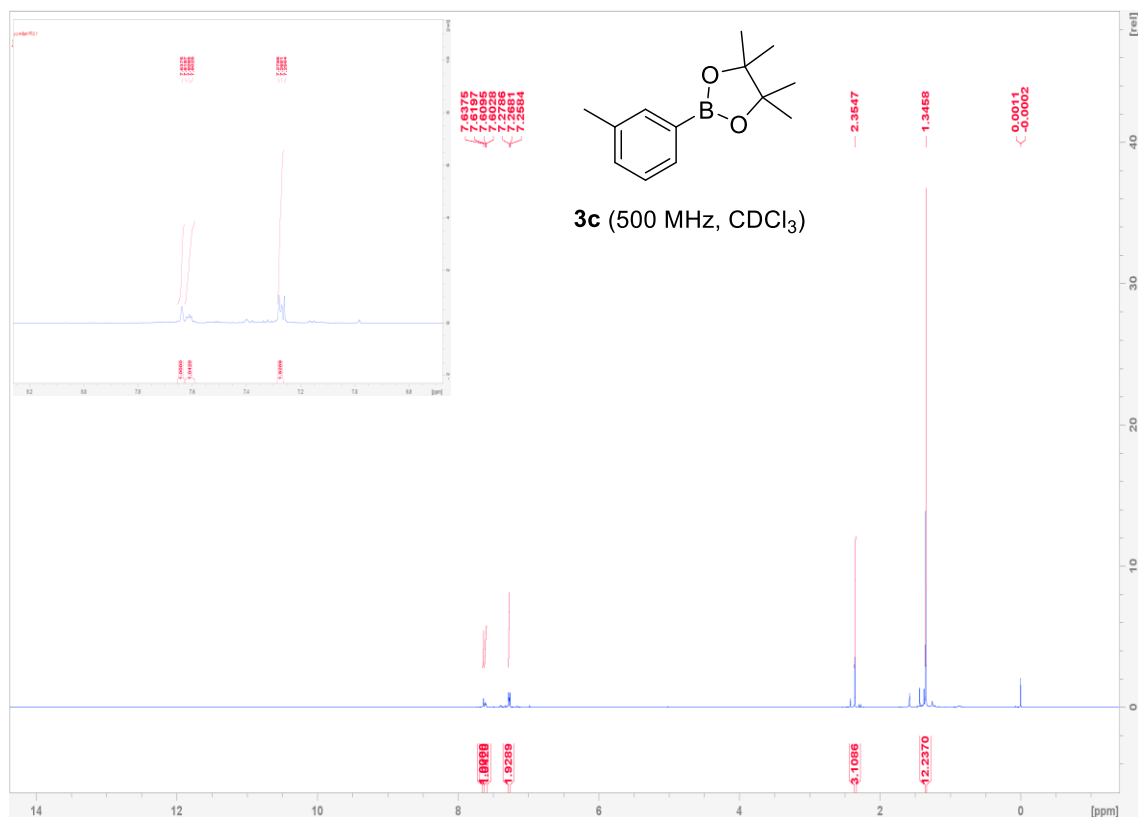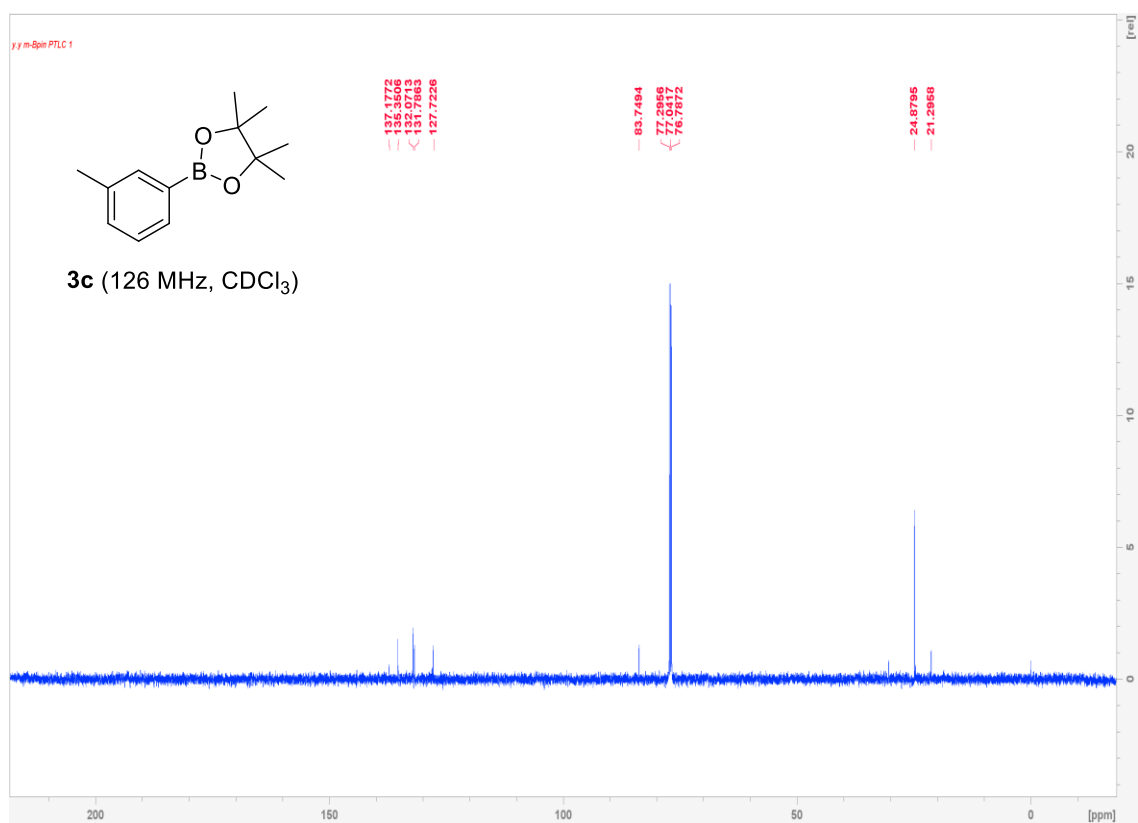

**Figure S4.**  $^1\text{H}$  and  $^{13}\text{C}\{^1\text{H}\}$  NMR spectra of compound **3d**

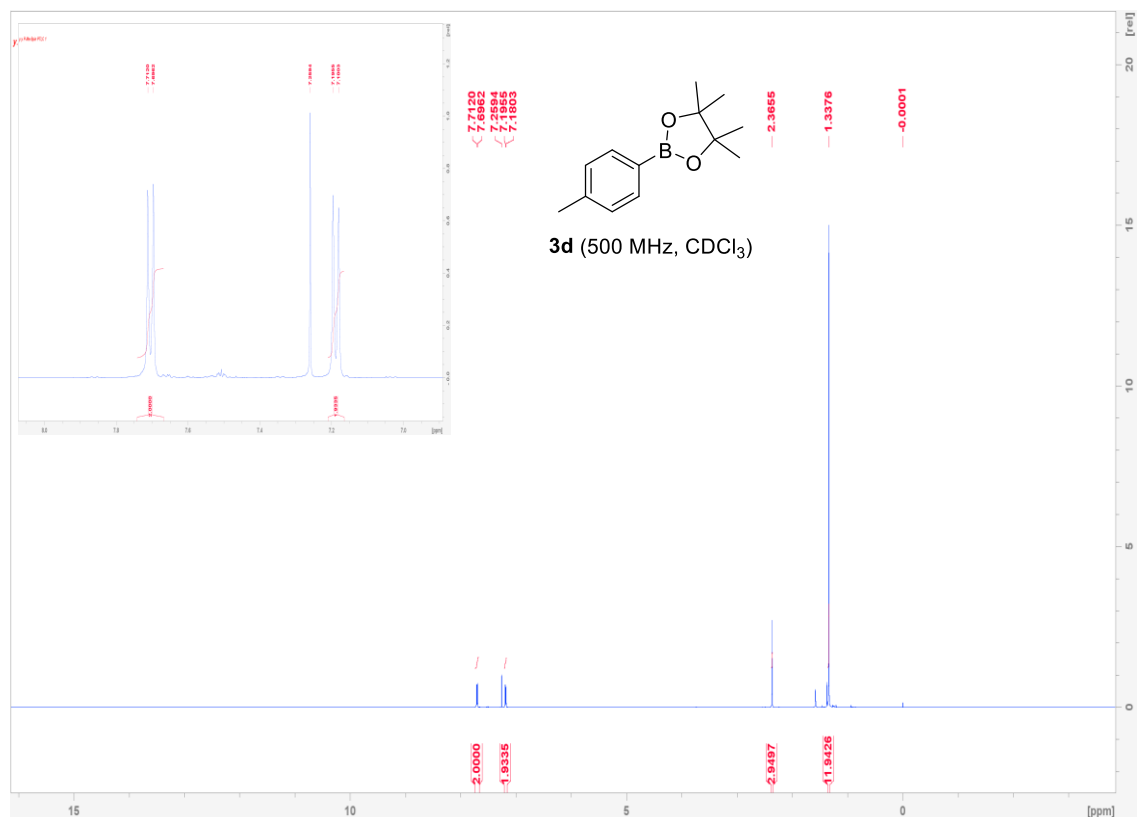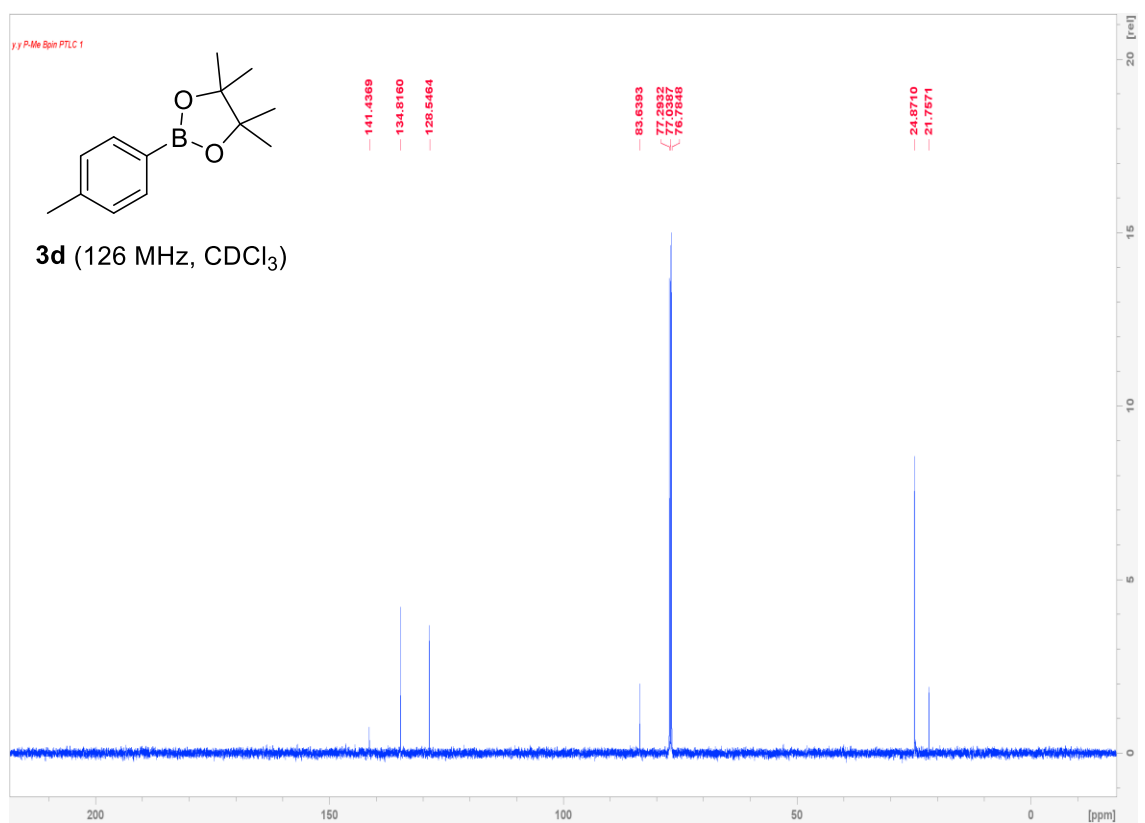

**Figure S5.**  $^1\text{H}$  and  $^{13}\text{C}\{^1\text{H}\}$  NMR spectra of compound **3e**

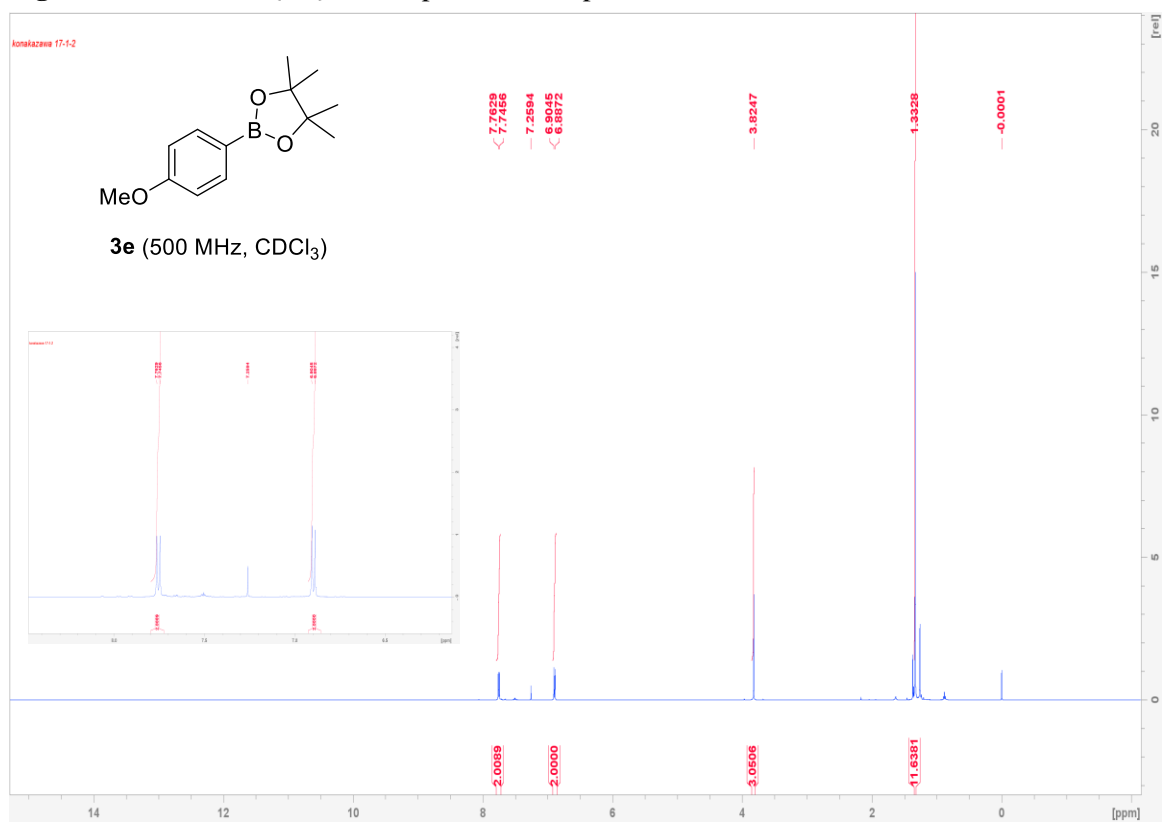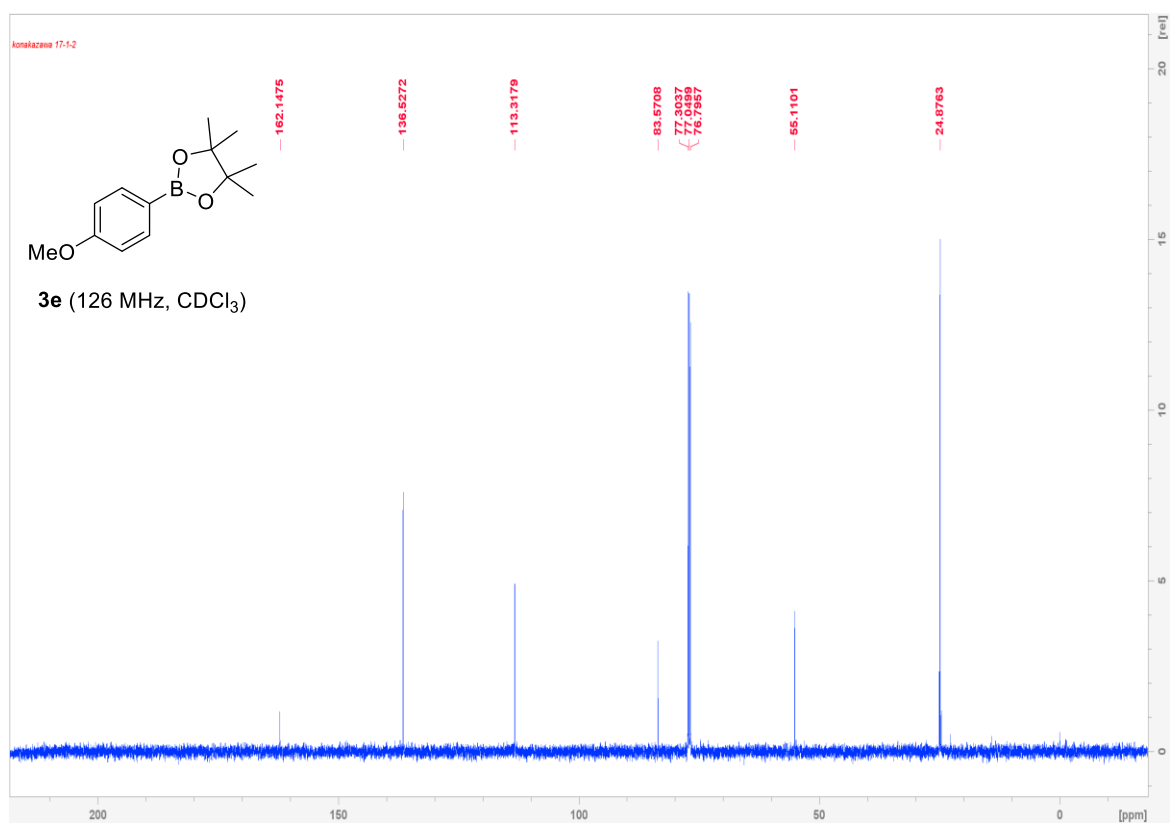

**Figure S6.**  $^1\text{H}$  and  $^{13}\text{C}\{^1\text{H}\}$  NMR spectra of compound **3f**

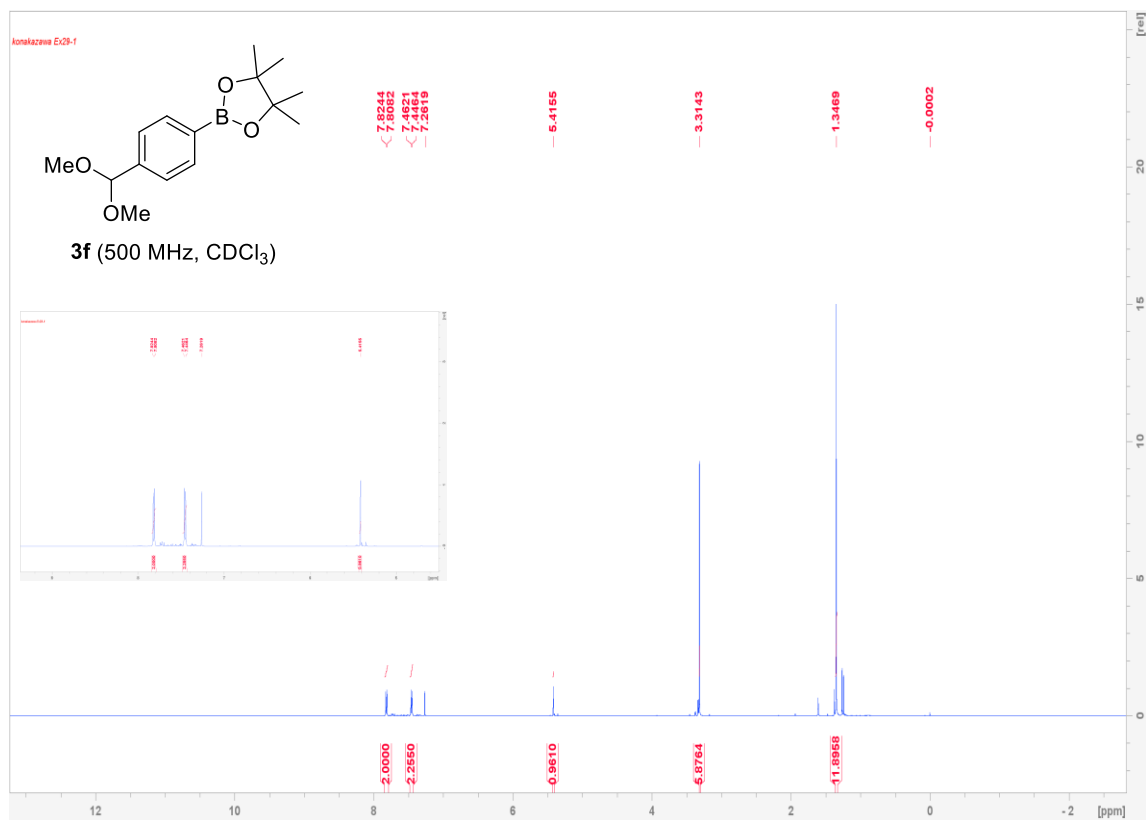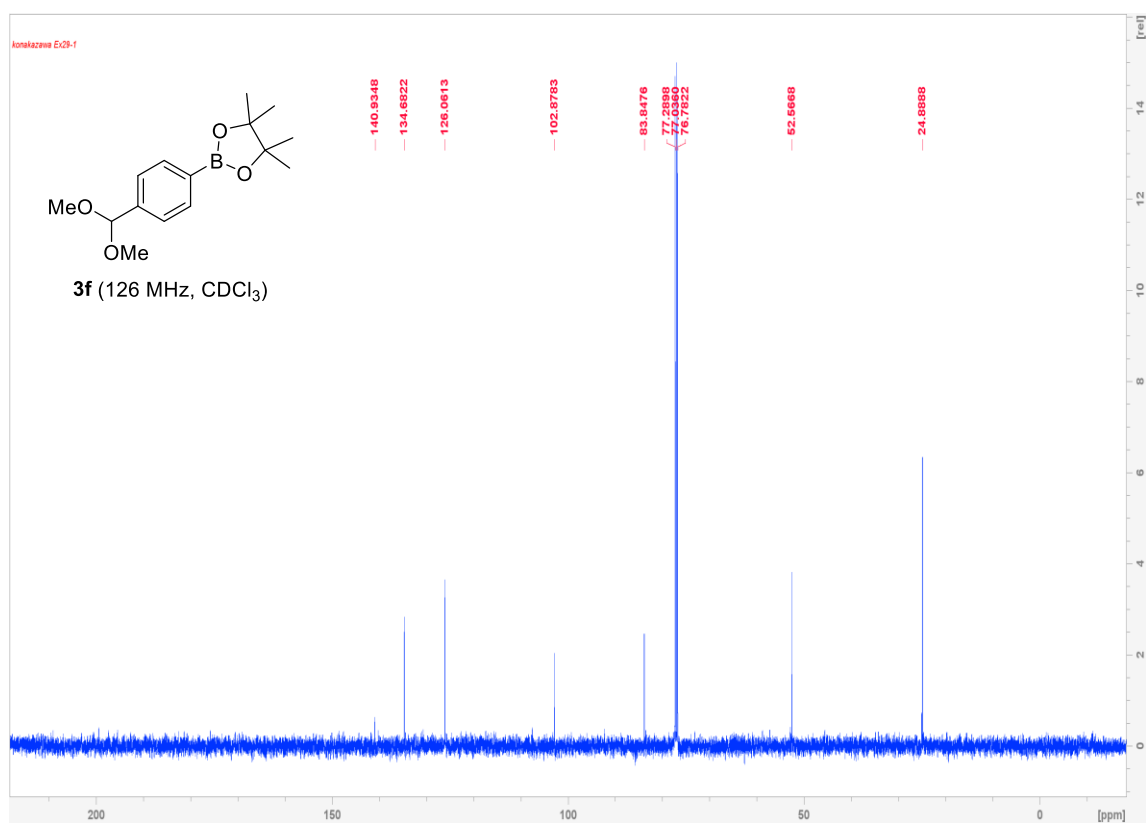

**Figure S7.**  $^1\text{H}$  and  $^{13}\text{C}\{^1\text{H}\}$  NMR spectra of compound **3g**

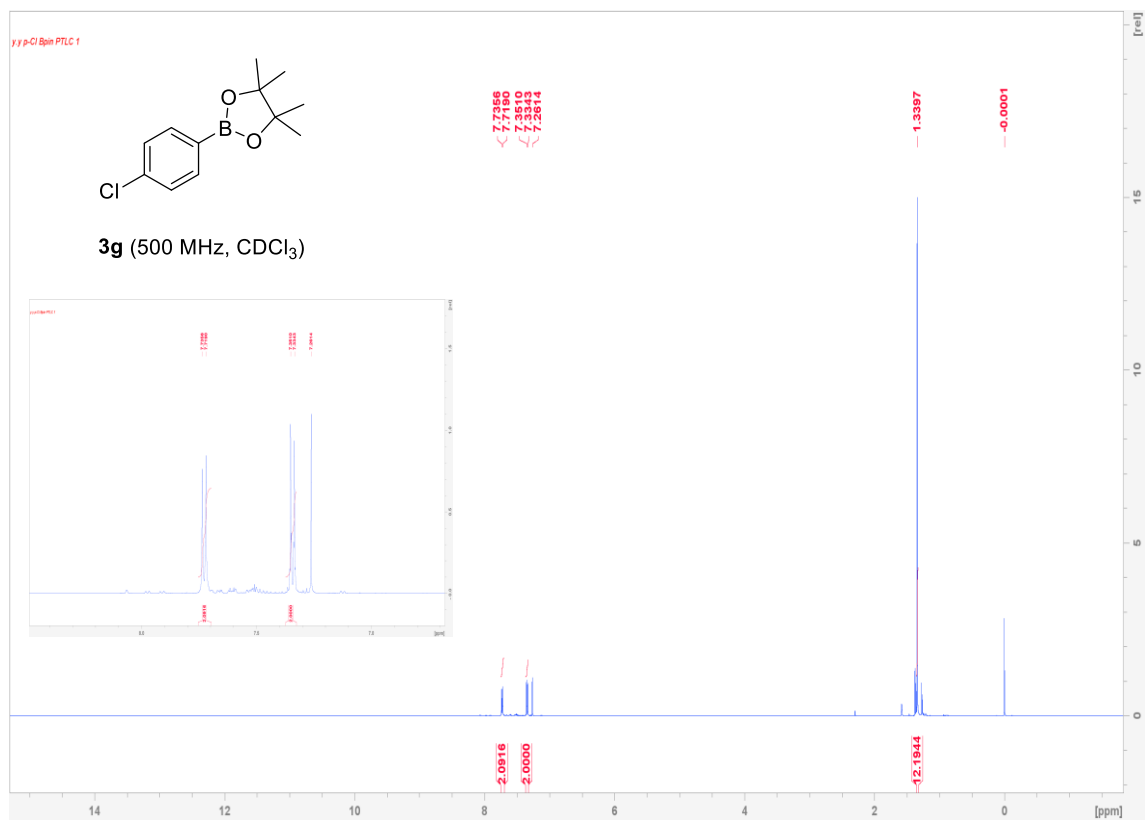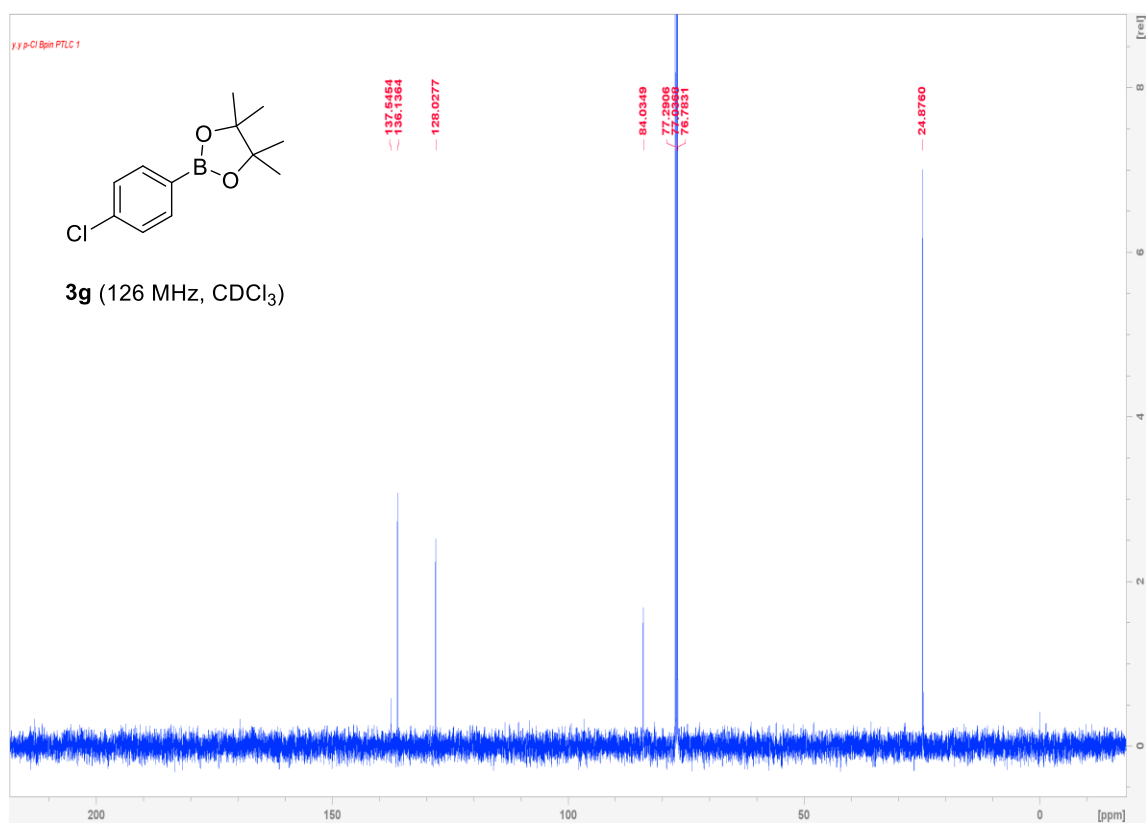

**Figure S8.**  $^1\text{H}$  and  $^{13}\text{C}\{^1\text{H}\}$  NMR spectra of compound **3I**

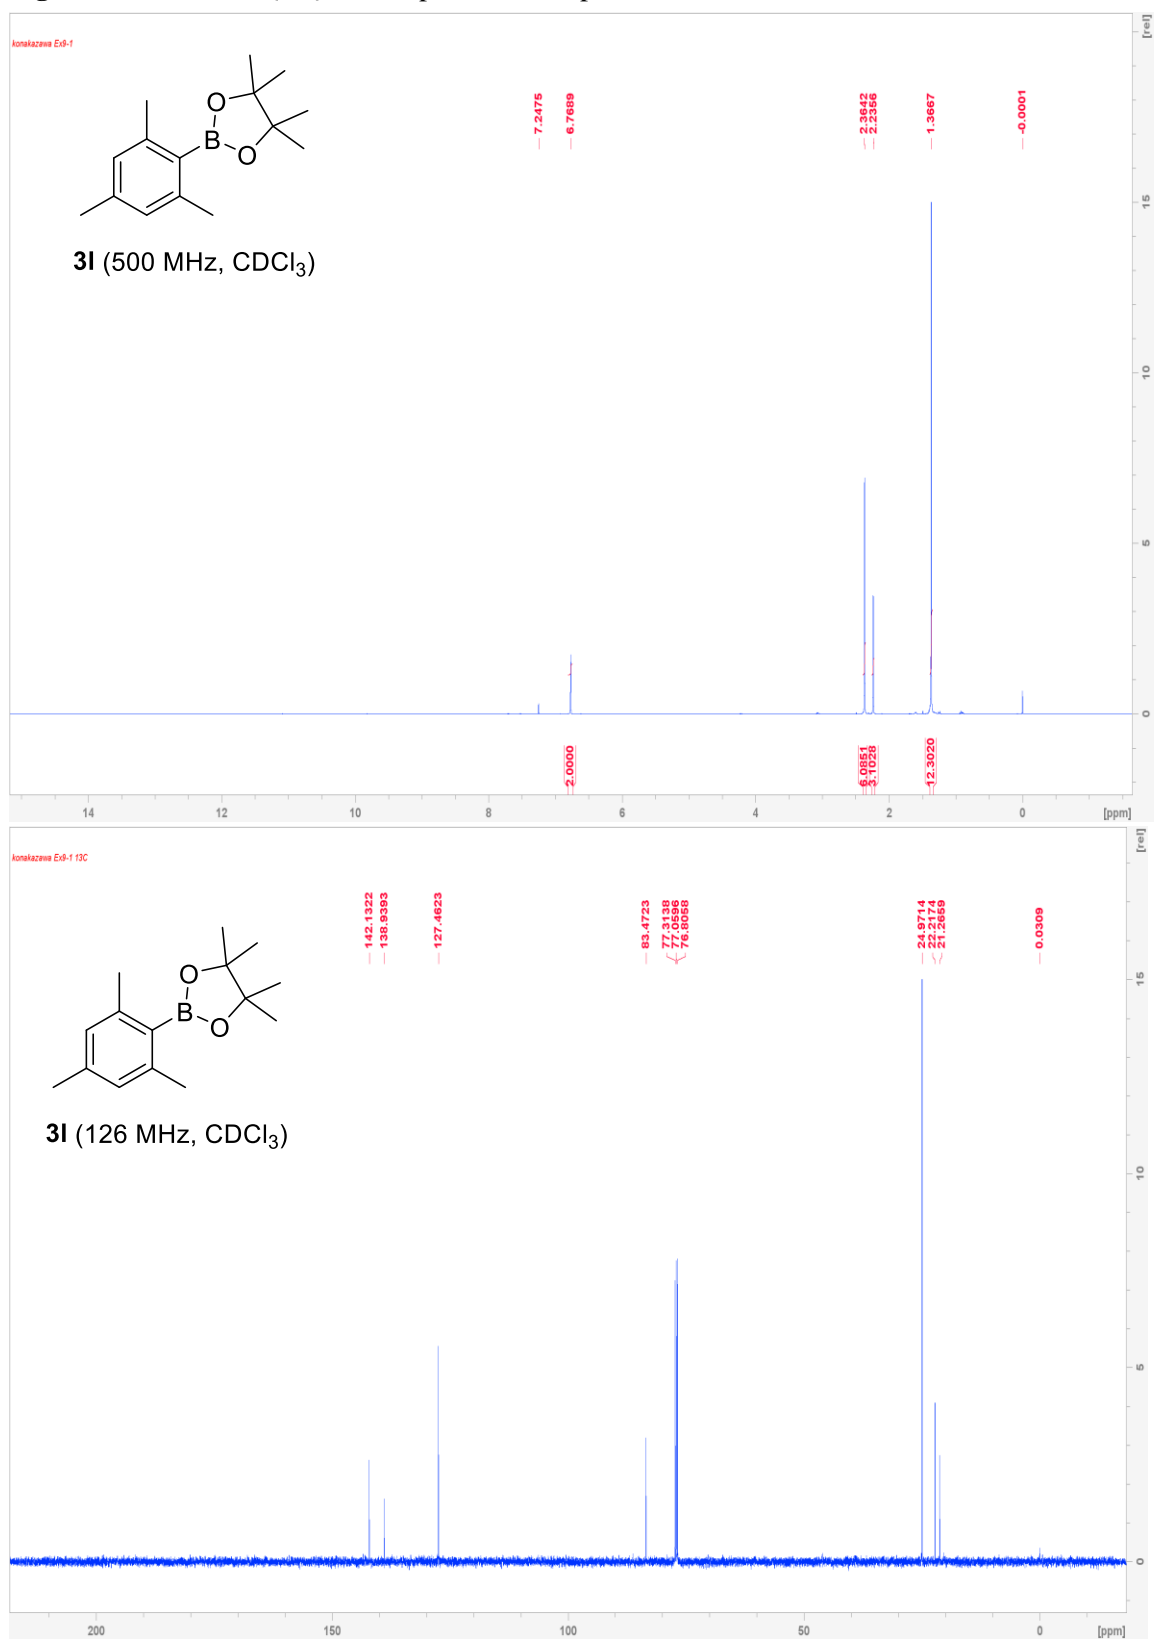

Supplement: Additional file 1 [file 1860-5397-20-216-S1.pdf]
